# Supplementary material for: Bioaccessibility of Tudela artichoke (Cynara scolymuscv. Blanca de Tudela) (poly)phenols: the effects of heat treatment, simulated gastrointestinal digestion and human colonic microbiota
Source: Royal Society of Chemistry journal article supplement (doi:10.1039/d0fo03119d), 2021-01-01
Supplement: d0fo03119d1.pdf [file d0fo03119d1.pdf]

**TITTLE: Bioaccessibility of Tudela artichokes (*Cynara Scolymus* cv. Blanca de Tudela) (poly)phenols: effect of heat treatment, simulated gastrointestinal digestion and human colonic microbiota**

**AUTHORS: Maite DOMÍNGUEZ-FERNÁNDEZ<sup>1</sup>, Iziar A. LUDWIG<sup>2,3</sup> <sup>†</sup>\*, María-Paz DE PEÑA<sup>§1,3</sup>, and Concepción CID<sup>§1,3</sup>**

<sup>1</sup> Universidad de Navarra, Facultad de Farmacia y Nutrición, Departamento de Ciencias de la Alimentación y Fisiología, C/Irunlarrea 1, E-31008 Pamplona, Spain

<sup>2</sup> Departament de Tecnologia d'Aliments, XaRTA-TPV, Agrotecnio Center, Escola Tècnica Superior d'Enginyeria Agrària, University of Lleida. Avda/ Alcalde Rovira Roure 191, 25198-Lleida, Catalonia, Spain

<sup>3</sup> IdiSNA, Navarra Institute for Health Research, Pamplona, Spain

<sup>†</sup> current address: University of Navarra, Center for applied medical research (CIMA), Medicinal Chemistry Laboratory, Avda. Pío XII, 55, E-31008, Pamplona, Spain

\*Corresponding author: Iziar A. Ludwig. E-mail address: [iludwig@unav.es](mailto:iludwig@unav.es). Phone: +34 948 425600 (Ext. 812000)

§Equal contribution

**Table S1.** Concentrations of electrolytes in Simulated Salivary Fluid (SSF), Simulated Gastric Fluid (SGF) and Simulated Intestinal Fluid (SIF). Final C is referred to the final concentration in the digestive fluid.

| Compuesto                                         | PM     | Stock solution |        |      | SSF (250 mL) |                  | SGF (250 mL) |                  | SIF (250 mL) |                  |
|---------------------------------------------------|--------|----------------|--------|------|--------------|------------------|--------------|------------------|--------------|------------------|
|                                                   |        | g/mol          | mol/L  | g/L  | g/50mL       | Final C (mmol/L) | mL stock     | Final C (mmol/L) | mL stock     | Final C (mmol/L) |
| KCl                                               | 74.55  | 0.5            | 37.28  | 1.86 | 15.10        | 10.79            | 6.90         | 4.60             | 6.80         | 6.18             |
| KH <sub>2</sub> PO <sub>4</sub>                   | 136.09 | 0.5            | 68.04  | 3.40 | 3.70         | 2.64             | 0.90         | 0.60             | 0.80         | 0.73             |
| NaHCO <sub>3</sub>                                | 84.01  | 1              | 84.01  | 4.20 | 13.60        | 4.86             | 25.00        | 8.33             | 85.00        | 38.64            |
| NaCl                                              | 58.40  | 2              | 116.80 | 5.84 | -            | -                | 47.20        | 7.87             | 38.40        | 8.73             |
| MgCl <sub>2</sub> (H <sub>2</sub> O) <sub>6</sub> | 203.21 | 0.15           | 30.48  | 1.52 | 0.15         | 0.36             | 0.10         | 0.22             | 0.33         | 1.00             |
| (NH <sub>4</sub> ) <sub>2</sub> CO <sub>3</sub>   | 96.09  | 0.5            | 48.05  | 2.40 | 0.06         | 0.04             | 0.50         | 0.33             | -            | -                |

**Table S2.** Mass spectrometric characteristics of (poly)phenolic compounds identified by LC-MS/MS

| Compound                            | Rt (min) | [M-H] <sup>-</sup> | MS/MS fragmentation | CE (eV) | LOQ (ng/L) | LOD (ng/L) |
|-------------------------------------|----------|--------------------|---------------------|---------|------------|------------|
| 1-CQA                               | 0.93     | 353                | 191(100), 179(3)    | -20     |            | -          |
| 3-CQA                               | 1.45     | 353                | 191(100), 179(72)   | -20     |            | -          |
| 4-CQA                               | 3.60     | 353                | 179(100), 179(90)   | -25     |            | -          |
| 5-CQA                               | 3.19     | 353                | 191(100), 179(2)    | -20     | 0.30       | 0.10       |
| 5-CQAcis                            | 6.08     | 353                | 191(100), 173(1)    | -20     |            | -          |
| Feruloyl-CQA                        | 8.38     | 529                | 161(100), 367(40)   | -40     |            | -          |
| 1,3-diCQA                           | 5.04     | 515                | 353(100), 191(83)   | -30     |            | -          |
| 1,4-diCQA                           | 6.31     | 515                | 353(100), 173(38)   | -25     |            | -          |
| 3,4-diCQA                           | 6.45     | 515                | 353(100), 173(88)   | -30     |            | -          |
| 1,5-diCQA                           | 6.70     | 515                | 191(100), 353(35)   | -30     |            | -          |
| 3,5-diCQA                           | 6.80     | 515                | 353(100), 191(67)   | -30     |            | -          |
| 4,5-diCQA                           | 7.68     | 515                | 353(100), 173(56)   | -30     |            | -          |
| diCQA glucoside I                   | 6.10     | 677                | 191(100), 323(63)   | -40     |            | -          |
| diCQA glucoside II                  | 6.17     | 677                | 323(100), 515(96)   | -40     |            | -          |
| Caffeoyl-hexoside                   | 2.81     | 341                | 179(100), 135(32)   | -30     |            | -          |
| Caffeic acid                        | 3.22     | 179                | 135(100)            | -30     |            | -          |
| Caffeic acid derivative             | 5.56     | 367                | 179(100), 135(44)   | -30     |            | -          |
| p-coumaroylquinic acid I            | 4.32     | 337                | 191(100), 163(5)    | -20     |            | -          |
| p-coumaroylquinic acid II           | 7.97     | 337                | 191(100), 163(45)   | -20     |            | -          |
| Isoferulic acid                     | 7.02     | 193                | 161(100), 134(96)   | -35     |            | -          |
| Rutin                               | 5.9      | 609                | 301(100)            | -40     | 2.06       | 0.68       |
| Apigenin 7-O-rutinoside             | 6.75     | 577                | 269(100)            | -40     |            | -          |
| Apigenin 7-O-glucoside              | 7.22     | 431                | 269(100)            | -50     |            | -          |
| Apigenin 7-O-glucuronide            | 6.08     | 445                | 269(100)            | -30     |            | -          |
| Apigenin                            | 10.45    | 269                | 117(100)            | -40     |            | -          |
| Apigenin acetylglucoside            | 8.61     | 473                | 269(100)            | -50     |            | -          |
| Luteolin 7-O-rutinoside             | 5.97     | 593                | 285(100)            | -50     |            | -          |
| Luteolin 7-O-glucoside              | 6.08     | 447                | 285(100)            | -40     |            | -          |
| Luteolin 7-O-glucuronide            | 6.10     | 461                | 285(100)            | -30     |            | -          |
| Luteolin acetylglucoside            | 7.65     | 489                | 285(100)            | -40     |            | -          |
| Luteolin                            | 9.13     | 285                | 133(100),155(1)     | -50     |            | -          |
| Pinoresinol 4-O-β-D-glucoside       | 6.41     | 519                | 357(100), 151(27)   | -30     |            | -          |
| Pinoresinol-acetylhexoside          | 8.14     | 561                | 357(100)            | -20     |            | -          |
| Dihydrocaffeic acid                 | 2.94     | 181                | 59(100), 138(28)    | -25     | 0.88       | 0.29       |
| 3-(3'-Hydroxyphenyl) propionic acid | 5.15     | 165                | 121(100), 42(42)    | -16     | 0.79       | 0.26       |
| 3-Phenylpropionic acid              | 8.36     | 149                | 105(100)            | -15     | 52.6       | 17.4*      |
| Phenylacetic acid                   | 5.98     | 135                | 91(100)             | -10     | 15.6       | 5.15       |
| Dihydrocaffeoylquinic acid          | 1.21     | 355                | 181(100), 191(10)   | -20     |            | -          |
| 3',4'-dihydroxyphenylacetic acid    | 1.36     | 167                | 123(100)            | -15     | 1.79       | 0.59       |
| 3'-hydroxyphenylacetic acid         | 3.59     | 151                | 107(100), 93(11)    | -10     | 10.3       | 3.41       |
| Protocatechuic acid                 | 1.16     | 153                | 109(100), 81(3)     | -20     | 0.21       | 0.07       |
| 1,2-Dihydroxybenzene (Catechol)     | 1.56     | 109                | 108(100),91(21)     | -25     | 0.67       | 0.22       |
| 4-hydroxybenzoic acid               | 2.02     | 137                | 93(100)             | -12     | 20.8       | 6.87       |

Rt, retention time; m/z, mass-to-charge ratio; [M-H]<sup>-</sup>, Negatively charged molecular ion; LOQ, limit of quantification of the standards used for quantification, LOD, limit of detection; \*expressed as ng/mL

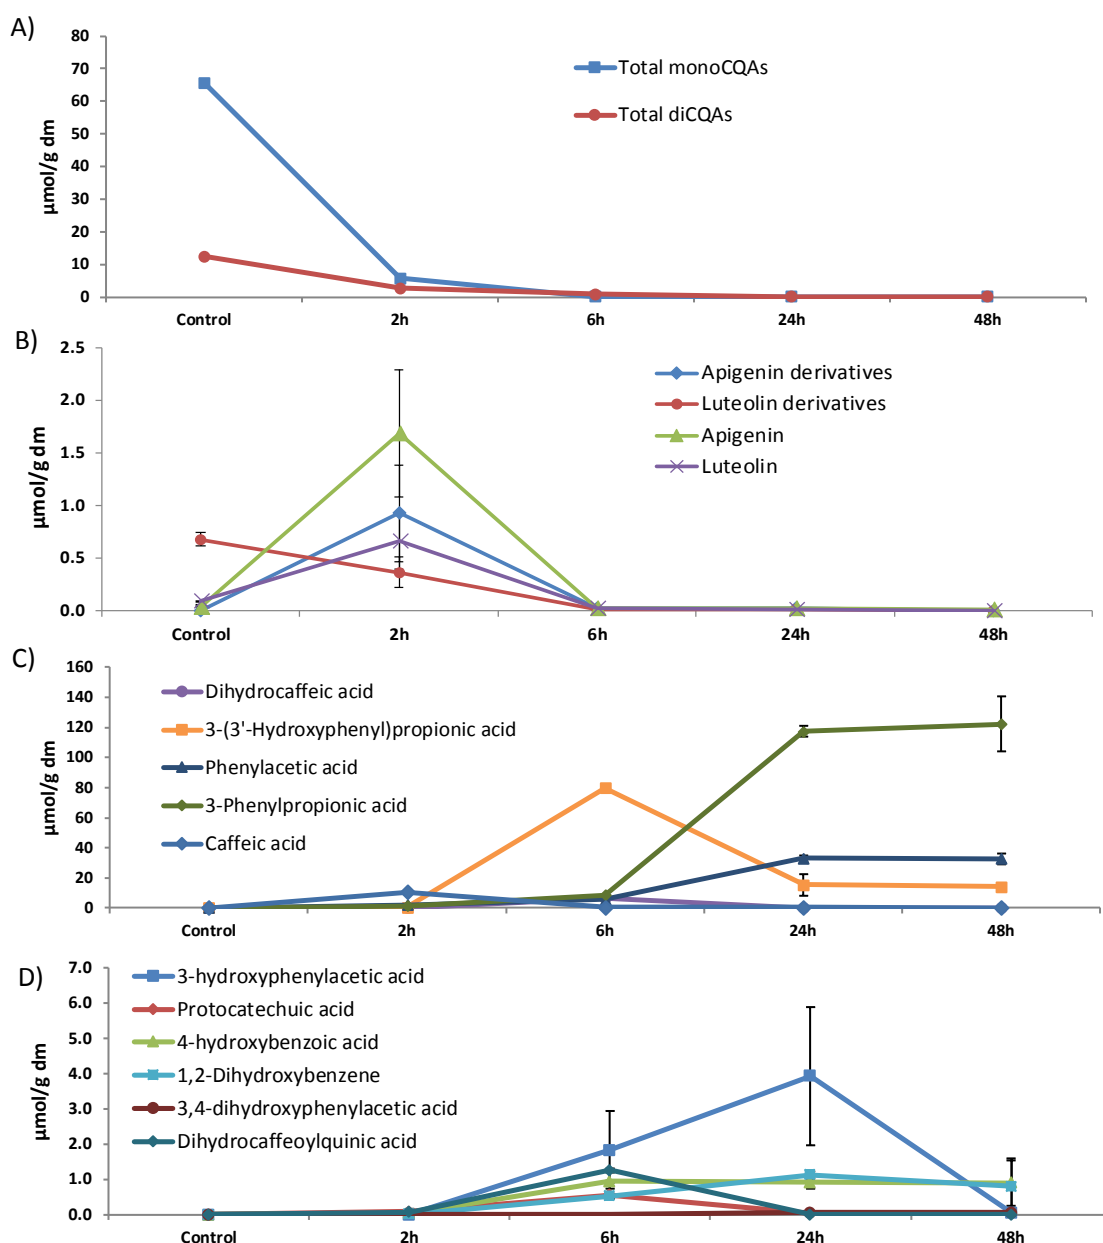

**Figure S1.** Profiles of degradation of native phenolic compounds of boiled artichokes and their catabolites during 48 h fecal fermentation. (A) Degradation of native phenolic acids: total monoCQAs and total diCQAs. (B) Degradation of native flavonoids. (C) Profile of the mayor phenolic catabolites produced. (D) Profile of the minor phenolic catabolites produced.

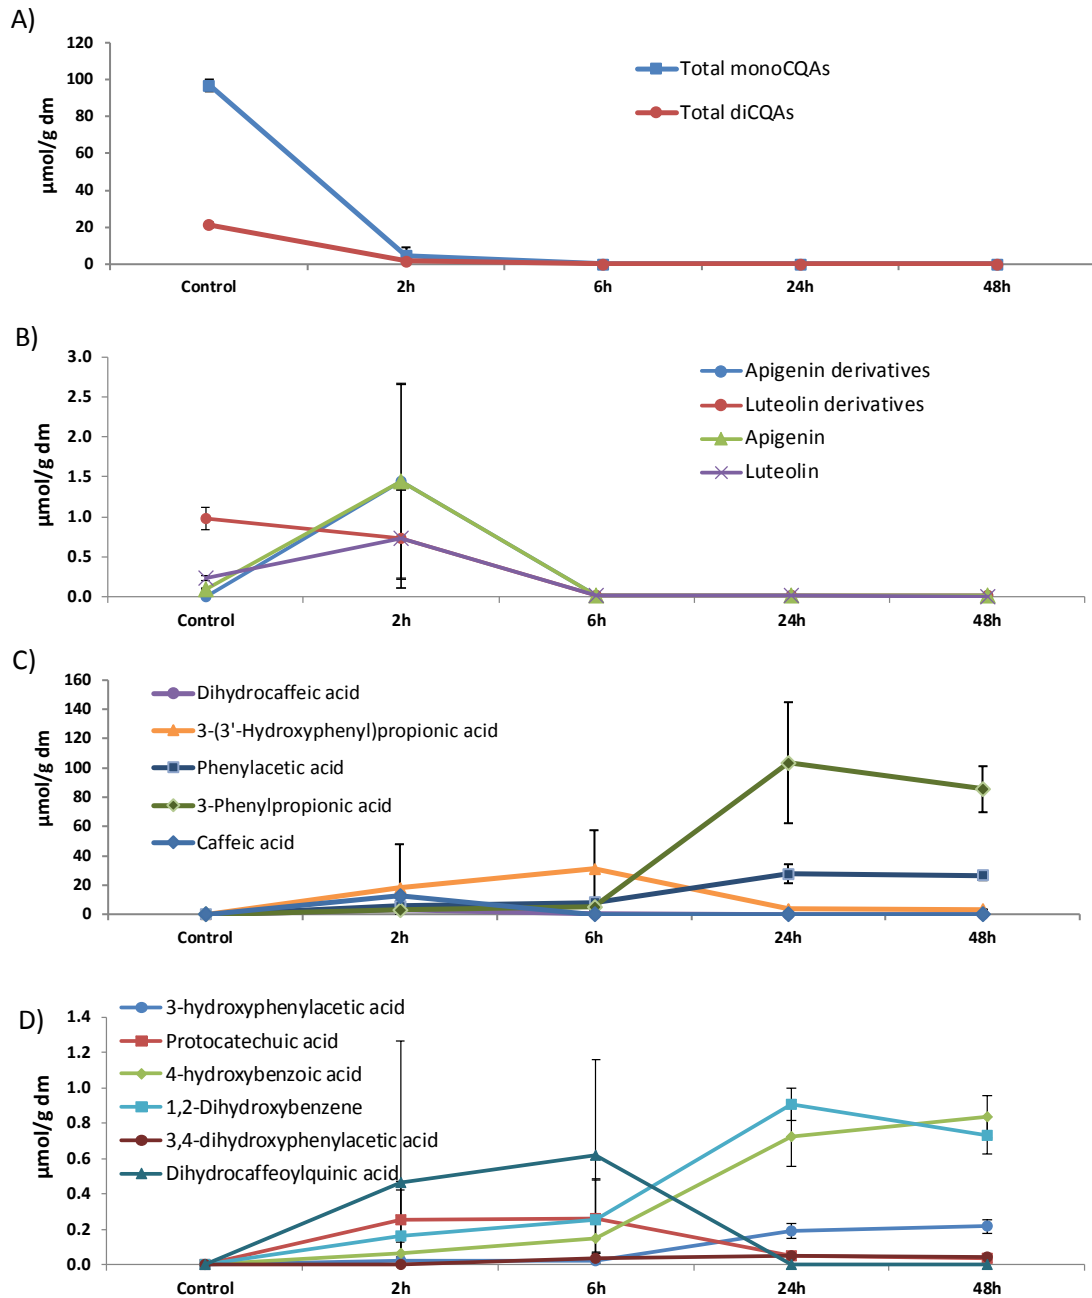

**Figure S2.** Profiles of degradation of native phenolic compounds of microwaved artichokes and their catabolites during 48 h fecal fermentation. (A) Degradation of native phenolic acids: total monoCQAs and total diCQAs. (B) Degradation of native flavonoids. (C) Profile of the mayor phenolic catabolites produced. (D) Profile of the minor phenolic catabolites produced.

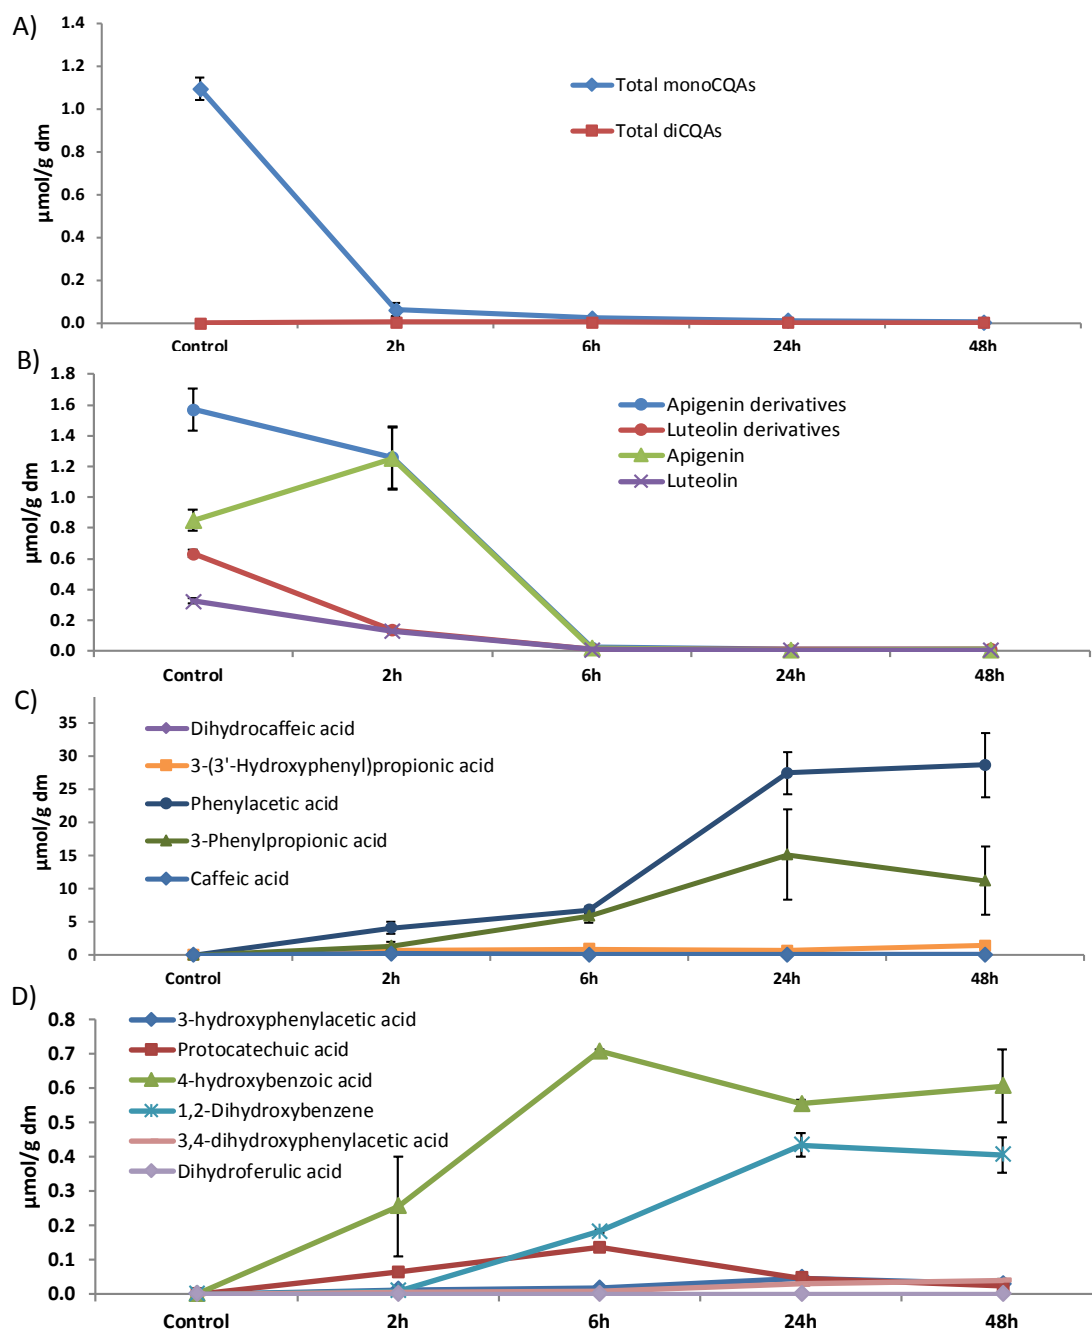

**Figure S3.** Profiles of degradation of native phenolic compounds of raw artichokes and their catabolites during 48 h fecal fermentation. (A) Degradation of native phenolic acids: total monoCQAs and total diCQAs. (B) Degradation of native flavonoids. (C) Profile of the mayor phenolic catabolites produced. (D) Profile of the minor phenolic catabolites produced.
